# Supplementary material for: HDAC-dependent decrease in histone crotonylation during DNA damage
Source: PubMed Central journal article supplement (PMC6821229; doi:10.1093/jmcb/mjz019), 2019-03-13
Supplement: jmcb-2018-0507_supplementary_material_mjz019.pdf [file jmcb-2018-0507_supplementary_material_mjz019.pdf]

## *Supplementary material*

### **HDAC-dependent decrease in histone crotonylation during DNA damage**

Enas R. Abu-Zhayia \*, Feras E. Machour \*, and Nabieh Ayoub<sup>1</sup>

\* These authors contributed equally to this work

Department of Biology, Technion - Israel Institute of Technology, Haifa 3200003, Israel.

<sup>1</sup>Corresponding author: Prof. Nabieh Ayoub, Faculty of Biology  
Technion - Israel Institute of Technology  
Haifa 3200003, Israel.  
Tel: +972-4-8294232 Fax: +972-4-8225153  
Email: [ayoubn@technion.ac.il](mailto:ayoubn@technion.ac.il)

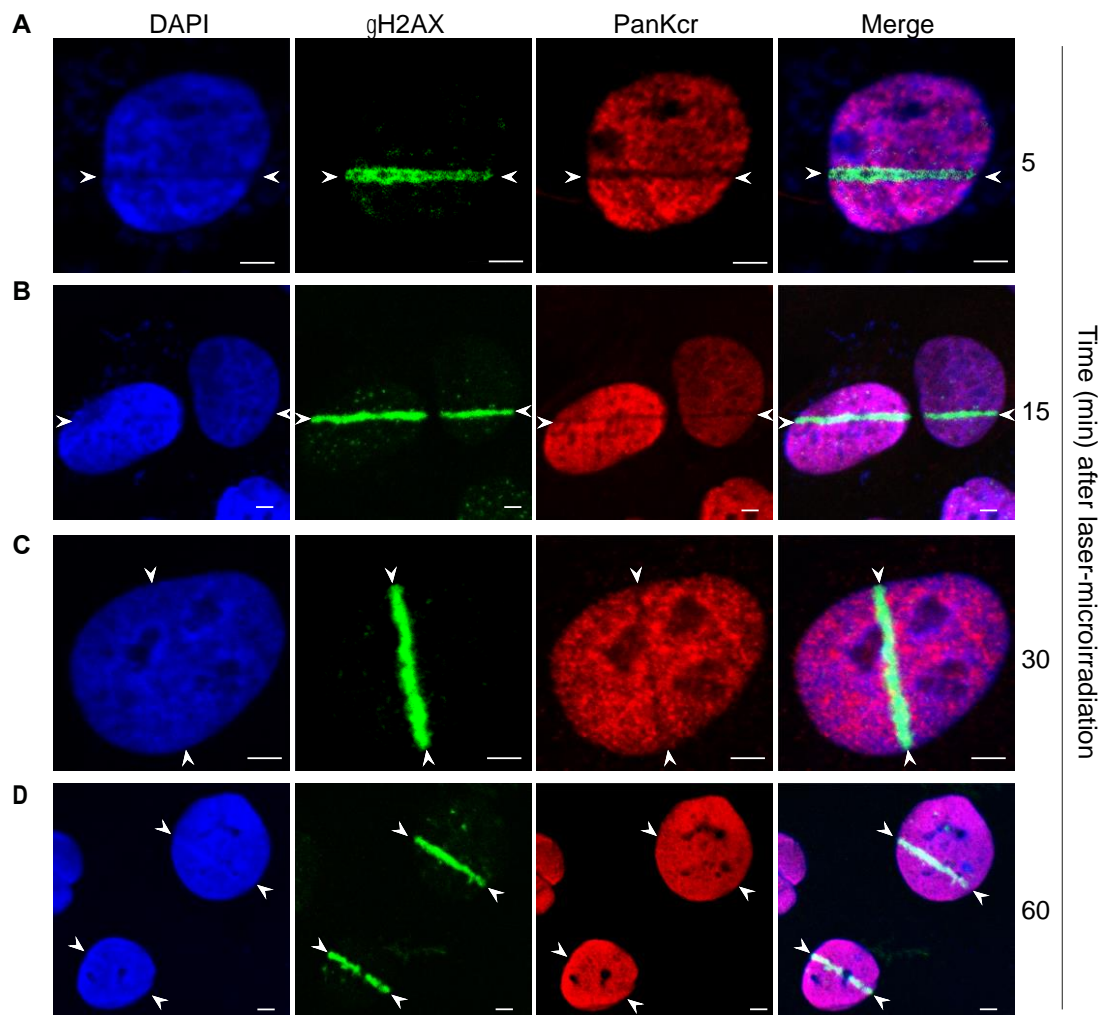

**Supplementary Figure S1. Rapid and transient decrease in lysine crotonylation at laser-microirradiated sites. (A-D)** Representative images of U2OS cells that were subjected to laser-microirradiation and costained with  $\gamma$ H2AX and Pan crotonyllysine (PTM-BIO, PTM-501) antibodies at the indicated time points after irradiation. DNA was stained with Hoechst (blue). Results show that the reduction in the intensity of the Kcr signal at DNA damage sites peaks at 5 minutes post irradiation, followed by gradual recovery to basal level at 1 hour after damage induction. Scale bar, 2  $\mu$ m.
